# Supplementary material for: HnRNP L is essential for peripheral T cell proliferation and survival
Source: Frontiers journal article supplement (doi:10.3389/fimmu.2025.1543145), 2025-04-10
Supplement: Image_2.pdf [file Image_2.pdf]

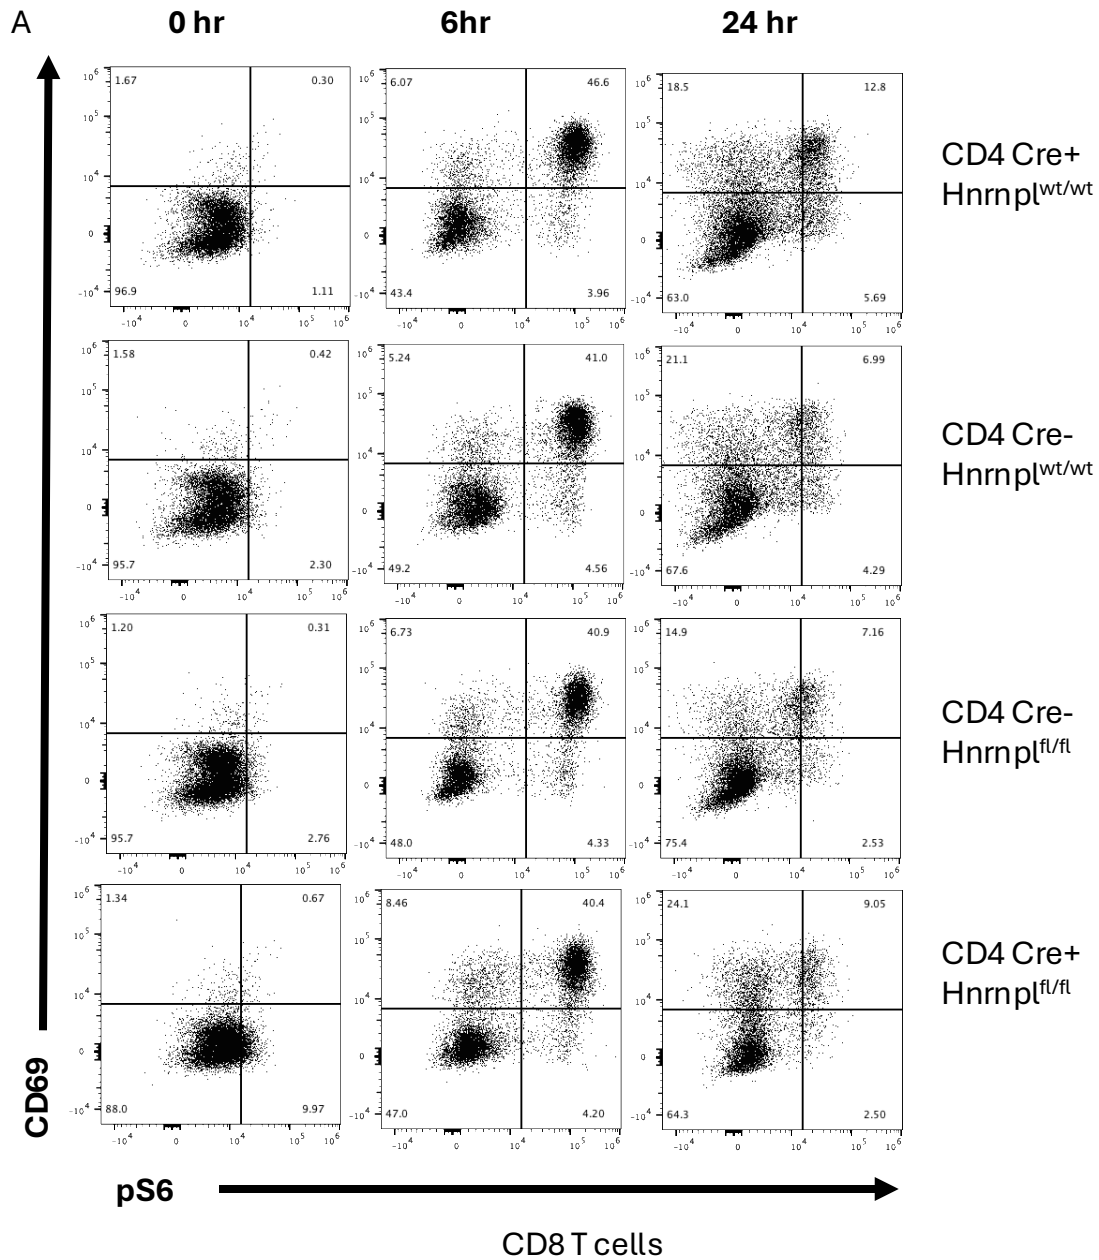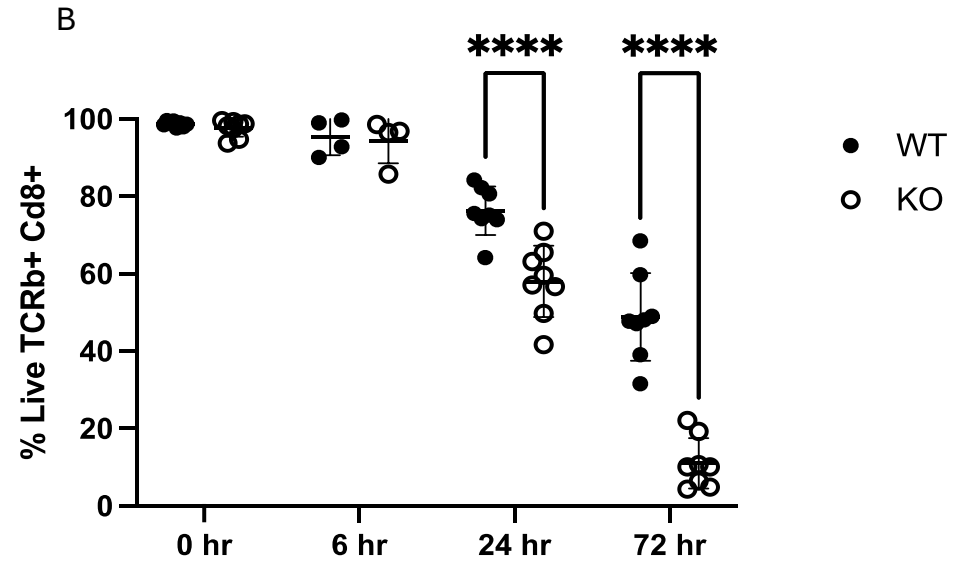

**Supplemental Figure 2. Early activation is normal in KO CD8 T cells, but significant cell death occurs 72 hours post activation.** T cells from WT (CD4Cre<sup>+</sup> hnrnp1<sup>wt/wt</sup>, CD4Cre<sup>-</sup> hnrnp1<sup>wt/wt</sup>, CD4Cre<sup>-</sup> hnrnp1<sup>fl/fl</sup>) and KO (CD4Cre<sup>+</sup> hnrnp1<sup>fl/fl</sup>) mice were isolated using a negative selection pan T cell isolation kit. 2-2.5x10<sup>5</sup> T cells were plated in a 96-well plate with 3.0 µg/ml plate-bound anti-CD3 in the presence of soluble 3.0 µg/ml anti-CD28. The cells were harvested after various time points. **(A)** Representative flow plot of stimulated CD8<sup>+</sup> T cell expression of CD69 vs pS6 at the indicated time points. **(B)** 2-2.5x10<sup>5</sup> T cells were plated in a 96-well plate with 3.0 µg/ml plate-bound anti-CD3 in the presence of soluble 3.0 µg/ml anti-CD28. The cells were harvested at the indicated times points and % of live cells, (gated on CD8<sup>+</sup> T cells) is presented for both WT and KO cells. \*\*\*\*p<0.0001
